# Supplementary material for: Causal Effects of Tea Intake on Multiple Types of Fractures: A Two-Sample Mendelian Randomization Study
Source: Preprints.org preprint supplement (doi:10.20944/preprints202204.0256.v1), 2022-04-27

***Supplementary Materials***

**SUPPLEMENTARY NOTES**

**Supplementary Table1.** For supplementary tables, see the CSV file of supplementary materials.

**Supplementary Figure1.** The funnel plot for MR analyses of causal associations between each tea intake SNP and multiple types of fractures.

**Supplementary Figure2.** Leave-one-out sensitivity analysis for multiple types of fractures using SNP-associated tea intake.

**Supplementary Figure3.** The forest plot for MR analyses of causal associations between each tea intake SNP and multiple types of fractures.


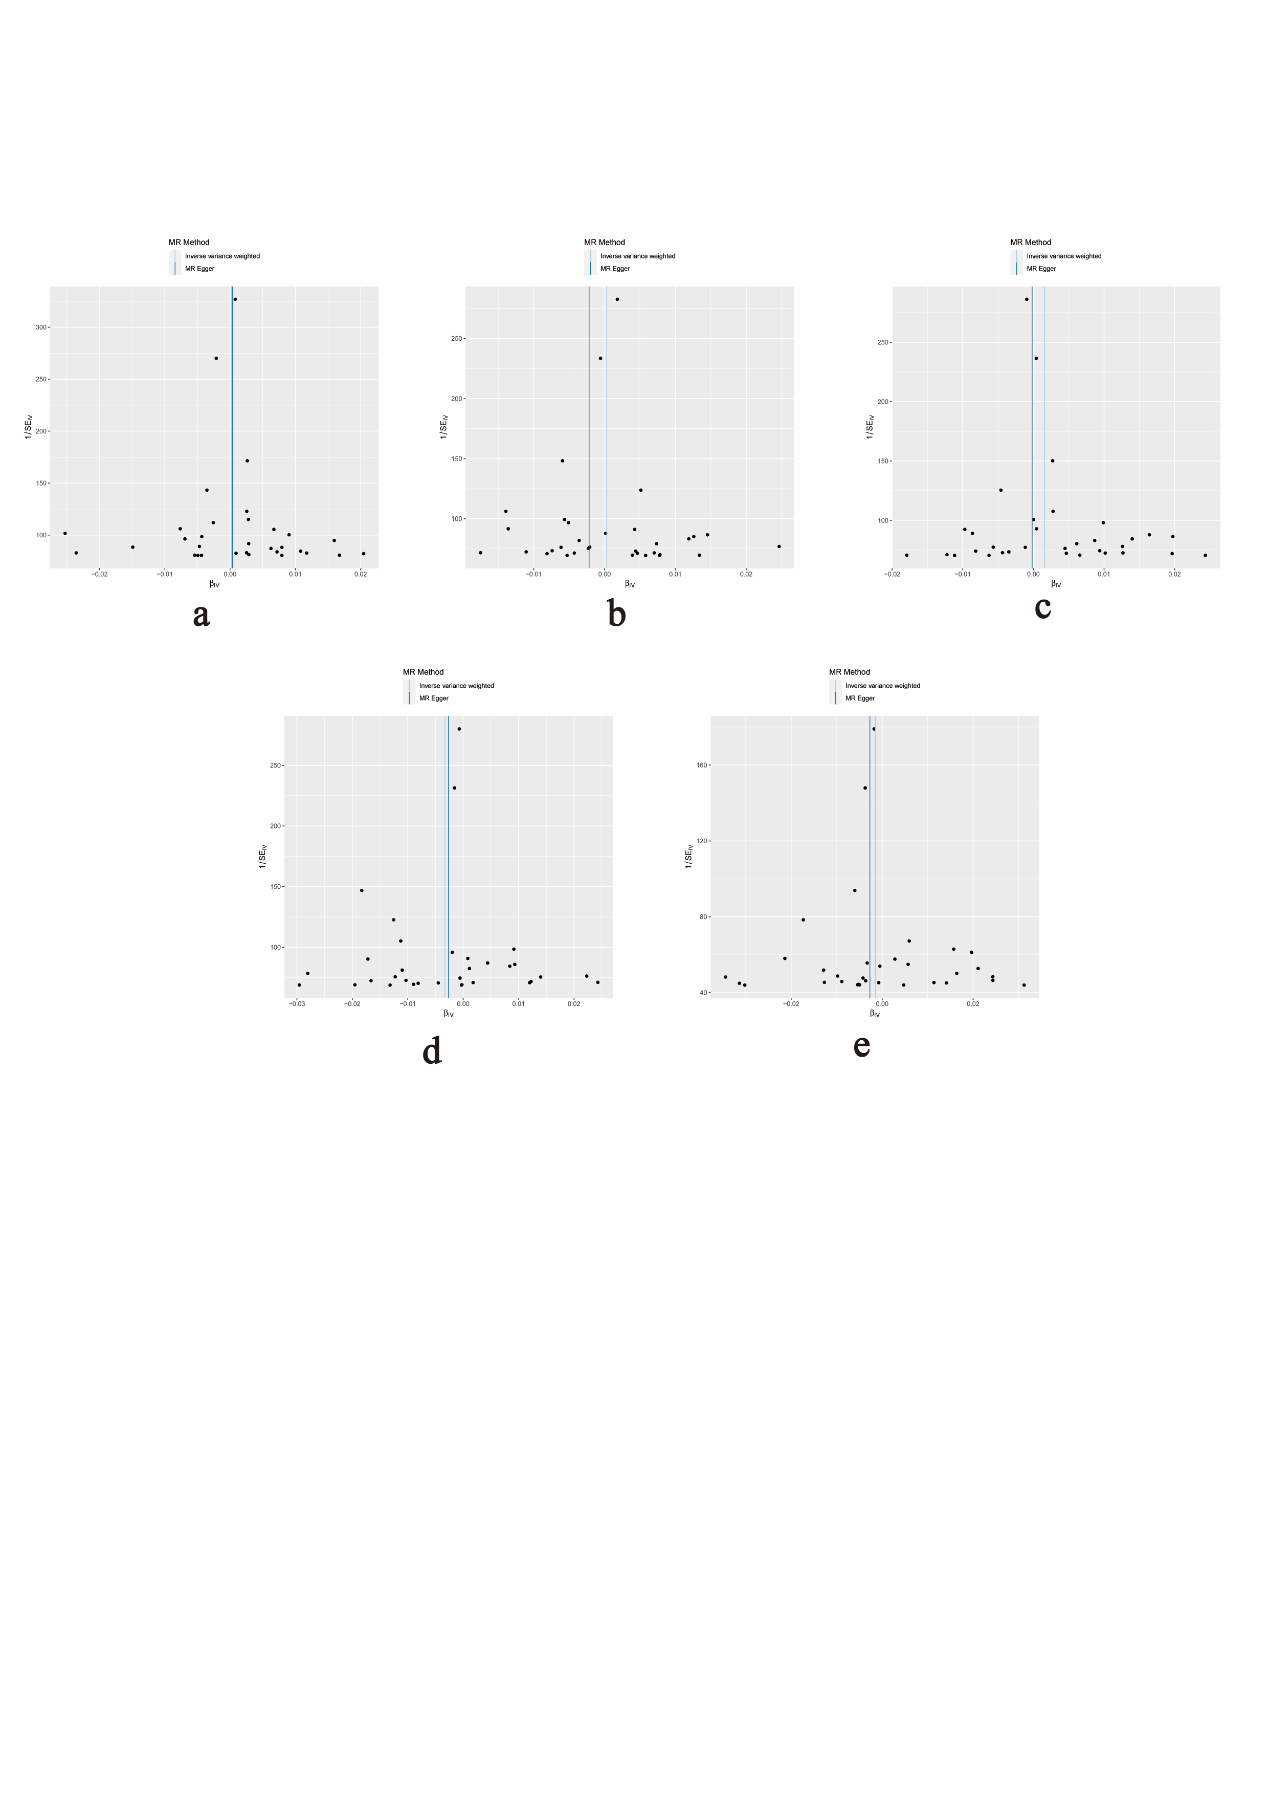
**Supplementary Figure1.** The funnel plot for MR analyses of causal associations between each tea intake SNP and multiple types of fractures.

**Supplementary Figure2.** Leave-one-out sensitivity analysis for multiple types of fractures using SNP-associated tea intake.

**
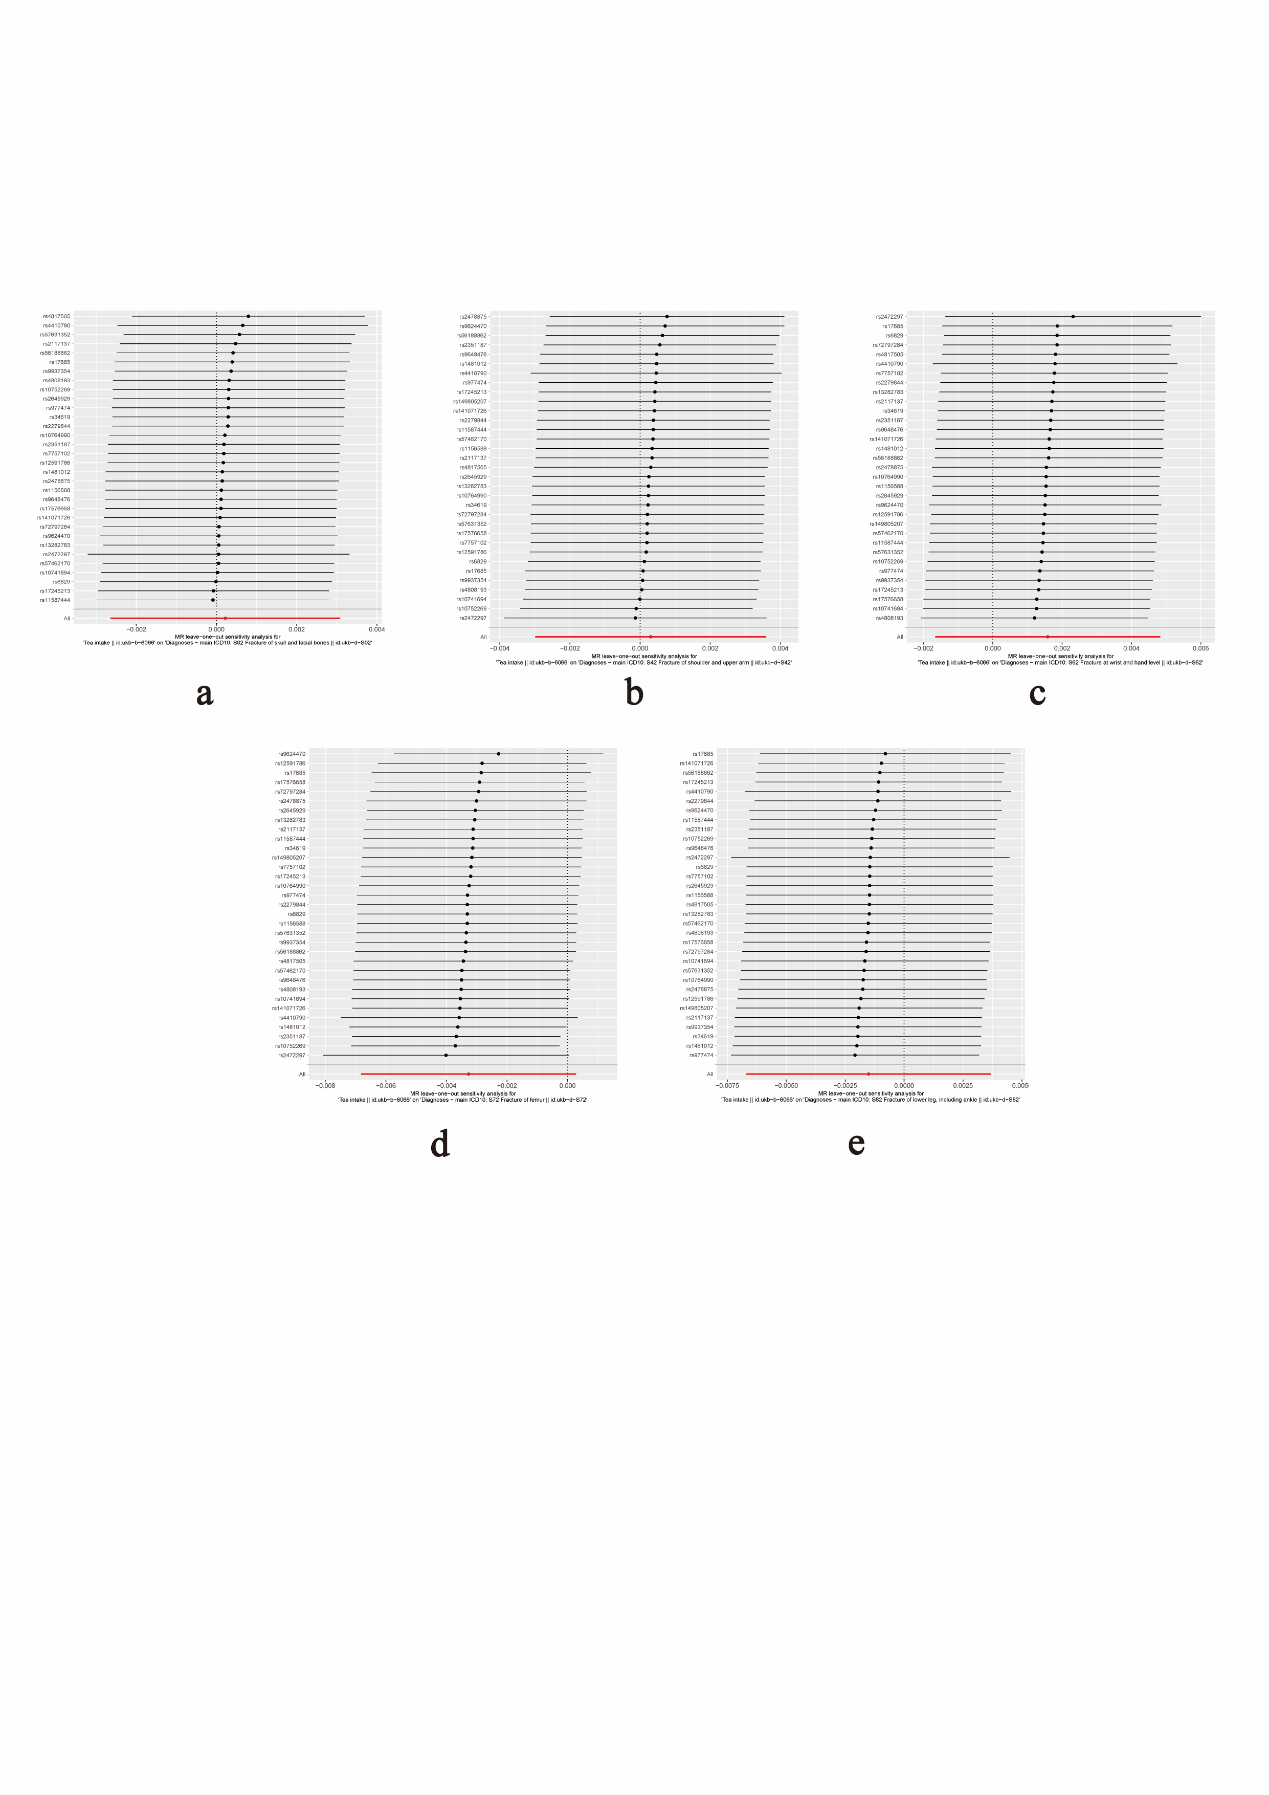
**

**Supplementary Figure3.** The forest plot for MR analyses of causal associations between each tea intake SNP and multiple types of fractures.


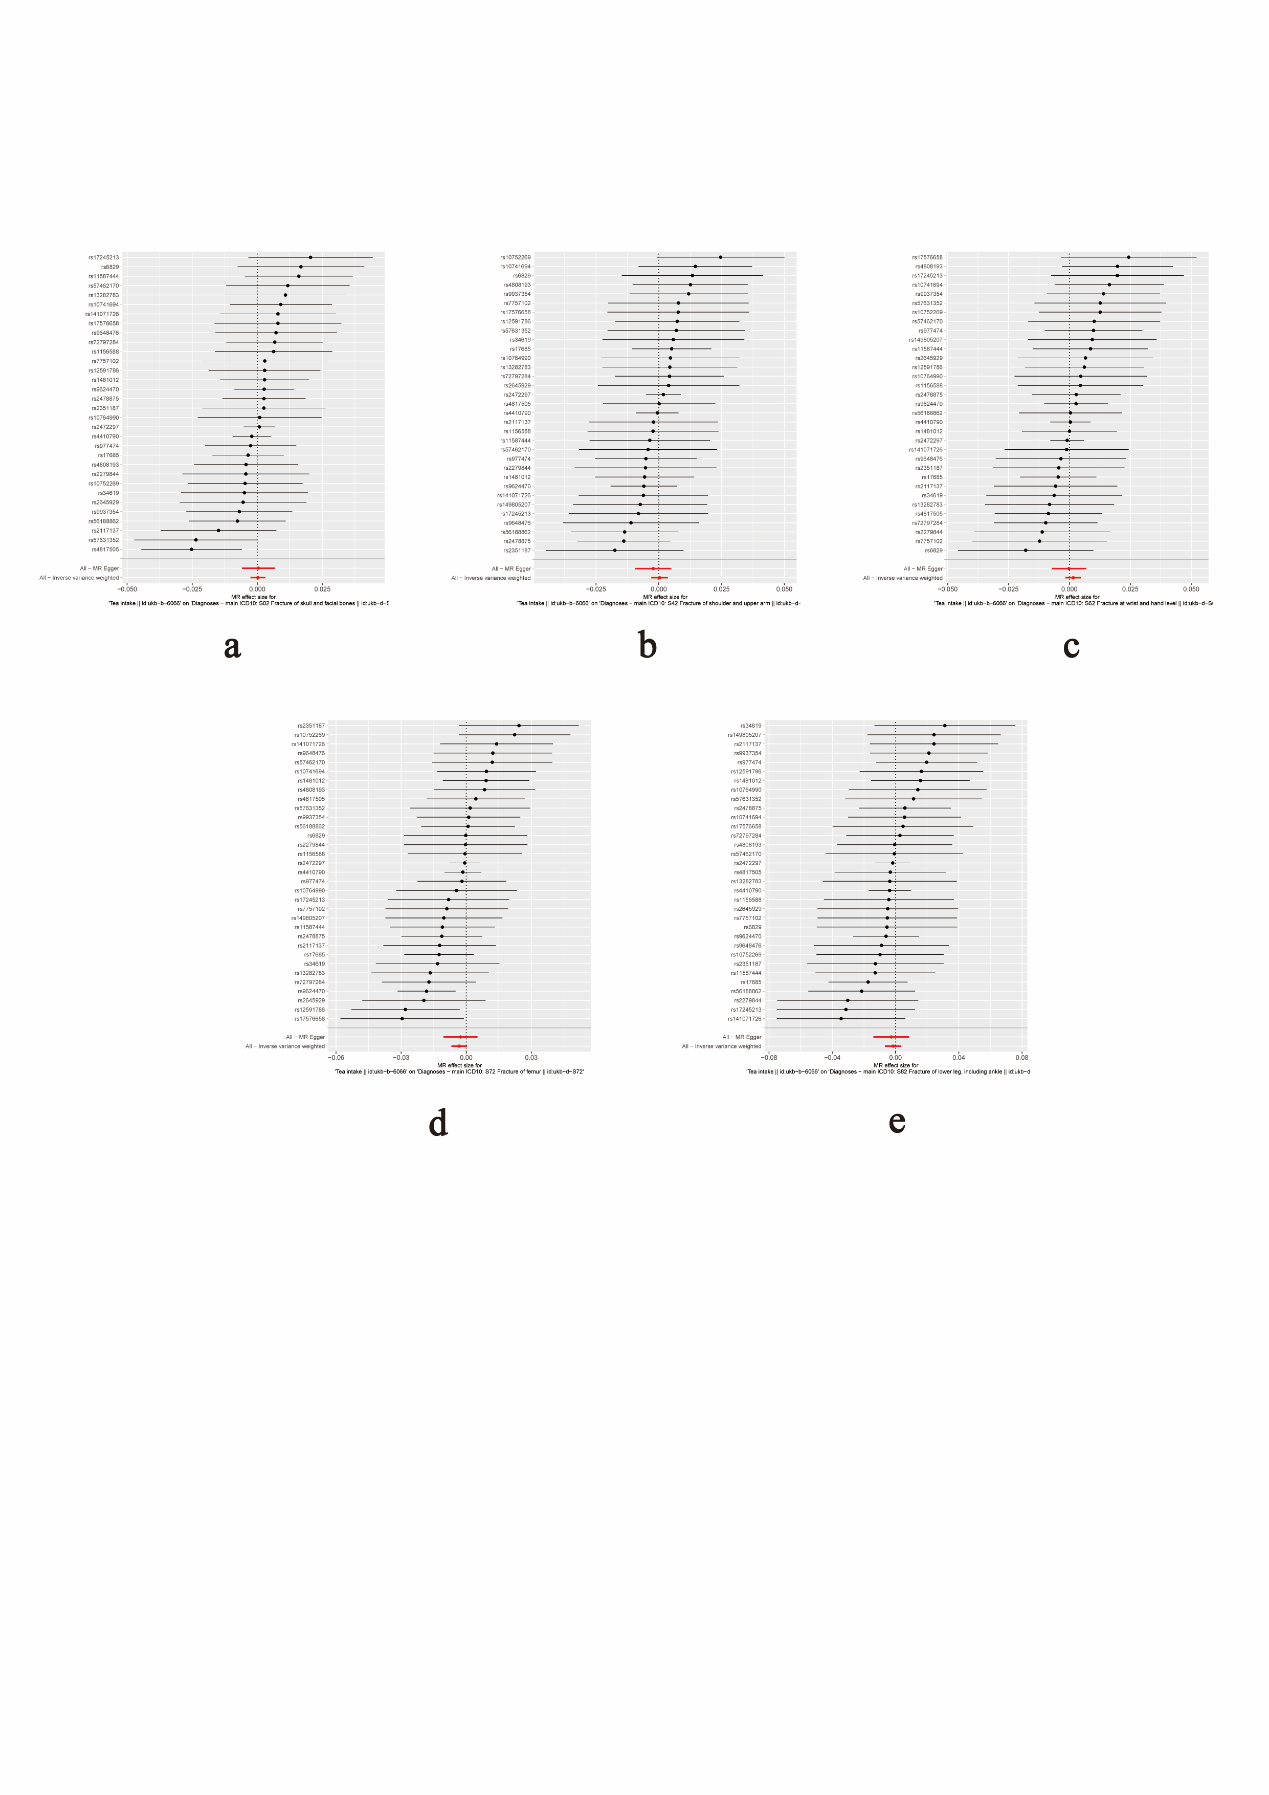

Supplement: Supplementary file 1 [file Supplementary materials.docx]
